# Supplementary material for: Nontyphoidal Salmonella among Children under 5 Years Old in Sub-Saharan Africa and South Asia in the Global Enteric Multicenter Study
Source: PubMed Central journal article supplement (PMC8832896; doi:10.4269/ajtmh.21-0762), 2021-11-08
Supplement: tpmd210762.SD1.pdf [file tpmd210762.SD1.pdf]

## Supplementary Tables

Table S1 (a). Country specific baseline characteristics of the NTS-positive children (n=1512)

| Characteristics<br>n (%)                               | South Asia            |                 |                     |                       | sub-Saharan Africa |                      |                    | Overall<br>n = 1512 |
|--------------------------------------------------------|-----------------------|-----------------|---------------------|-----------------------|--------------------|----------------------|--------------------|---------------------|
|                                                        | Bangladesh<br>n = 284 | India<br>n = 72 | Pakistan<br>n = 365 | The Gambia<br>n = 168 | Mali<br>n = 8      | Mozambique<br>n = 28 | Kenya<br>n = 584   |                     |
| Non-typhoidal <i>Salmonella</i> (+)                    | 71 (18.8)             | 18 (4.8)        | 92 (24.3)           | 42 (11.1)             | 2 (0.5)            | 7 (1.9)              | 146 (38.6)         | 378 (25)            |
| <b>Age group</b>                                       |                       |                 |                     |                       |                    |                      |                    |                     |
| 0–11 months                                            | 41 (57.8)             | 11(61.1)        | 39 (42.4)           | 19 (45.2)             | -                  | 6 (85.7)             | 68 (46.6)          | 184 (48.7)          |
| 12–23 months                                           | 16 (22.5)             | 3 (16.7)        | 33 (35.9)           | 19 (45.2)             | 1 (50)             | 1 (14.3)             | 46 (31.5)          | 119 (38.5)          |
| 24–59 months                                           | 14 (19.7)             | 4 (22.2)        | 20 (21.7)           | 4 (9.5)               | 1 (50)             | -                    | 32 (21.9)          | 75 (19.8)           |
| <b>Gender (Female)</b>                                 | 29 (40.9)             | 3 (16.7)        | 36 (39.1)           | 24 (57.1)             | 1 (50)             | 2 (28.6)             | 57 (3.0)           | 152 (40.2)          |
| Breastfed                                              | 60 (84.5)             | 17(94.4)        | 49 (53.3)           | 33 (78.6)             | -                  | 6 (85.7)             | 105 (71.9)         | 270 (71.4)          |
| <b>Baseline Anthropometry</b>                          |                       |                 |                     |                       |                    |                      |                    |                     |
| MUAC, median <sup>†</sup>                              | 13.8 ± 1.3            | 14.2 ± 1.3      | 13.1 ± 1.4          | 13.8 ± 1.4            | 14.6 ± 2.4         | 13.2 ± 1.5           | 14.0 ±             | 13.7 ± 1.5          |
| HAZ <sup>†</sup>                                       | -1.09 ± 1.1           | -1.09 ± 1.2     | -2.18 ± 1.4         | -1.41 ± 1.8           | -1.47 ± 2.4        | -1.95 ± 1.6          | 1.6<br>-1.39 ±     | -1.52 ± 1.4         |
| WAZ <sup>†</sup>                                       | -1.32 ± 1.3           | -1.05 ± 1.4     | -2.15 ± 1.3         | -1.36 ± 1.5           | -1.87 ± 2.0        | -1.87 ± 1.5          | 1.4<br>-1.18 ± 1.4 | -1.47 ± 1.4         |
| WHZ <sup>†</sup>                                       | -0.95 ± 1.3           | -0.63 ± 1.2     | -1.33 ± 1.3         | -0.77 ± 1.8           | -1.69 ± 1.3        | -0.93 ± 1.0          | -0.58 ± 1.4        | -0.87 ± 1.4         |
| <b>Clinical features</b>                               |                       |                 |                     |                       |                    |                      |                    |                     |
| Diarrhea                                               | 42 (59.2)             | 4 (22.2)        | 39 (42.4)           | 17 (40.5)             | 2 (100)            | 5 (71.4)             | 81(55.5)           | 190 (50.3)          |
| Visible blood in stool                                 | 34 (47.9)             | 1 (5.6)         | 9 (9.9)             | 2 (4.8)               | -                  | 1 (14.3)             | 8 (5.5)            | 55 (14.6)           |
| Fever                                                  | 33 (46.5)             | 7 (38.9)        | 34 (36.9)           | 9 (21.4)              | 1 (50)             | 3 (42.7)             | 103(70.6)          | 190 (50.3)          |
| Vomiting ≥3 times/day                                  | 6 (8.5)               | 3 (16.7)        | 17 (18.5)           | 10 (23.8)             | 1 (50)             | -                    | 47 (32.2)          | 84 (22.2)           |
| <b>Socio-demographic characteristics</b>               |                       |                 |                     |                       |                    |                      |                    |                     |
| Primary caretaker (mother)                             | 71 (100)              | 18 (100)        | 88 (95.7)           | 40 (95.2)             | 2 (100)            | 7 (100)              | 141 (96.6)         | 367 (97.1)          |
| Mother's education (literate)                          | 66 (92.9)             | 14 (77.8)       | 30 (32.6)           | 38 (90.5)             | 1 (50)             | 7 (100)              | 144 (98.6)         | 266 (70.4)          |
| People regularly sleep in the house <sup>†</sup>       | 5.3 ± 2.1             | 4.9 ± 2.1       | 8.7 ± 4.8           | 24.7 ± 18.3           | 16.5 ± 0.7         | 5.8 ± 2.9            | 4.7 ± 1.7          | 8.1 ± 9.1           |
| Presence of under 5 children in the house <sup>†</sup> | 0.7 ± 0.6             | 0.3 ± 0.6       | 0.9 ± 1.3           | 1.9 ± 2.9             | 1.5 ± 0.7          | 0.9 ± 0.7            | 0.9 ± 0.9          | 0.9 ± 1.4           |
| <b>Wealth index</b>                                    |                       |                 |                     |                       |                    |                      |                    |                     |
| poorest                                                | 14 (19.7)             | 5 (27.8)        | 10 (10.9)           | 12 (28.6)             | -                  | 1 (14.3)             | 20 (13.7)          | 62 (16.4)           |
| Lower middle                                           | 13 (18.3)             | 3 (16.7)        | 25 (27.2)           | 8 (19.1)              | -                  | 2 (28.6)             | 33 (22.6)          | 84 (22.2)           |
| Middle                                                 | 16 (22.5)             | 3 (16.7)        | 24 (26.1)           | 7 (16.7)              | -                  | 2 (28.6)             | 37 (25.3)          | 89 (23.5)           |
| Upper middle                                           | 14 (19.7)             | 5 (27.8)        | 15 (16.3)           | 9 (21.4)              | 1 (50)             | 1 (14.3)             | 18 (12.3)          | 63 (16.7)           |
| Richest                                                | 14 (19.7)             | 2 (11.1)        | 18 (19.6)           | 6 (14.3)              | 1 (50)             | 1 (14.3)             | 38 (26.0)          | 80 (21.2)           |
| <b>Animal present at the house</b>                     |                       |                 |                     |                       |                    |                      |                    |                     |
| Sheep                                                  | 2 (2.8)               | -               | -                   | 31 (73.8)             | 1 (50)             | -                    | 46 (31.5)          | 80 (21.2)           |
| Goat                                                   | 11 (15.5)             | 7 (38.9)        | 8 (8.7)             | 30 (71.4)             | -                  | 1 (14.3)             | 88 (60.3)          | 145 (38.4)          |
| Cow                                                    | 39 (54.9)             | 1 (5.6)         | 4 (4.4)             | 16 (38.1)             | -                  | -                    | 107 (23.3)         | 167 (44.2)          |
| Fowl/ Rodent                                           | 41 (57.8)             | 9 (50)          | 13 (14.1)           | 38 (90.5)             | -                  | 4 (57.1)             | 141 (96.6)         | 246 (65.1)          |
| Cat                                                    | 63 (88.7)             | 17 (94.4)       | 8 (8.7)             | 7 (16.7)              | -                  | -                    | 101 (69.2)         | 196 (51.9)          |
| Dog                                                    | 60 (84.5)             | 18 (100)        | 3 (3.3)             | 13(30.9)              | -                  | -                    | 103 (70.6)         | 197 (52.1)          |

|                                                |           |           |           |           |         |          |            |            |
|------------------------------------------------|-----------|-----------|-----------|-----------|---------|----------|------------|------------|
| <b>Main source of drinking water</b>           |           |           |           |           |         |          |            |            |
| Use tube well water                            | 68 (95.8) | -         | -         | 8 (19.0)  | -       | -        | 5 (3.4)    | 81(21.4)   |
| Use a water treatment method                   | 1 (1.5)   | 11 (61.1) | 31 (36.1) | 13 (36.1) | -       | -        | 88 (61.9)  | 144 (40.1) |
| <b>Fecal disposal</b>                          |           |           |           |           |         |          |            |            |
| Toilet facility available in the house         | 65 (91.6) | 18 (100)  | 89 (96.7) | 42 (100)  | 2 (100) | 7 (100)  | 107 (73.3) | 330 (87.3) |
| <b>Hand wash material</b>                      |           |           |           |           |         |          |            |            |
| <b>Routinely hand wash with water and soap</b> | 52 (73.2) | 7 (38.9)  | 60 (65.2) | 32 (76.2) | 2 (100) | 6 (85.7) | 139 (95.2) | 298 (78.8) |
| <b>Practice handwashing</b>                    |           |           |           |           |         |          |            |            |
| Before nursing a child                         | 22 (30.9) | 14 (77.8) | 32 (34.8) | 14 (33.3) | 1 (50)  | 5 (71.4) | 40 (27.4)  | 128 (33.9) |
| After handling animal                          | 22 (30.9) | -         | 8 (8.7)   | 8 (19.1)  | -       | -        | 11 (7.5)   | 49 (12.9)  |
| After cleaning the child                       | 22 (30.9) | 15 (83.3) | 54 (58.7) | 36 (85.7) | -       | 1 (14.3) | 38 (26.0)  | 166 (43.9) |
| <b>Co-pathogens isolated in stool</b>          |           |           |           |           |         |          |            |            |
| <i>Campylobacter</i>                           | 16 (22.5) | 1 (5.6)   | 32 (34.8) | 1 (2.4)   | -       | -        | 15 (10.3)  | 65 (17.2)  |
| <i>Giardia</i>                                 | 5 (7.0)   | 4 (22.2)  | 18 (19.6) | 3 (7.1)   | 1 (50)  | 1 (14.3) | 19 (13.0)  | 51 (13.6)  |
| <i>Cryptosporidium</i>                         | 5 (7.0)   | 0         | 8 (8.7)   | 3 (7.1)   | 0       | 1 (14.3) | 9 (6.2)    | 26 (6.8)   |
| EAEC                                           | 17 (23.9) | 5 (27.8)  | 16 (17.4) | 13 (30.9) | 0       | 1 (14.3) | 26 (17.8)  | 78 (20.6)  |
| ETEC                                           | 2 (2.8)1  | 1 (5.6)   | 9 (9.8)   | 7 (16.7)  | 0       | 1 (14.3) | 10 (6.9)   | 30 (7.9)   |

¶ Mean ± standard deviation; height-for-age z-score: HAZ, weight-for-age z-score: WAZ, weight-for-height z-score: WHZ, MUAC (mid upper arm circumference): median (mean; for children <5 years of age) mid-upper arm circumference, diarrhea: 3 or more stool/day, fever: measured at least 38-degree Celsius. NTS, non-typhoidal Salmonella, WASH: water, sanitation, and hygiene, EAEC: Enteraggregative E. coli, ETEC: Enterotoxigenic E. coli

Table S1 (b). Characteristics of the NTS-positive and NTS-negative under 5 sub-Sahara African and South Asian children

| Characteristics                       | NTS-positive MSD                |                       |                       |          |                      |                       |                                               | Asymptomatic NTS-Positive |                      |                     |                      |            |             |       |
|---------------------------------------|---------------------------------|-----------------------|-----------------------|----------|----------------------|-----------------------|-----------------------------------------------|---------------------------|----------------------|---------------------|----------------------|------------|-------------|-------|
|                                       | Total NTS (+) MSD<br>n= 190 (%) | sub-Saharan Africa    |                       | p-value* | South Asia           |                       | Total<br>Asymptomatic<br>NTS (+)<br>n=188 (%) | sub-Saharan Africa        |                      |                     | South Asia           |            | p-value*    |       |
|                                       |                                 | NTS (+)<br>n= 105 (%) | NTS (-)<br>n= 237 (%) |          | NTS (+)<br>n= 85 (%) | NTS (-)<br>n= 224 (%) |                                               | NTS (+)<br>n=92 (%)       | NTS (-)<br>n=354 (%) | NTS (+)<br>n=96 (%) | NTS (-)<br>n=319 (%) |            |             |       |
| <b>Age group</b>                      |                                 |                       |                       |          |                      |                       |                                               |                           |                      |                     |                      |            |             |       |
| 0-11m                                 | 87 (45.8)                       | 44 (41.9)             | 7 (40.9)              | -        | 43 (50.6)            | 110 (49.1)            | -                                             | 97 (51.60)                | 49 (53.26)           | 122 (34.46)         | -                    | 48 (50.00) | 116 (36.36) | -     |
| 12-23m                                | 57 (30.0)                       | 35 (33.3)             | 4 (35.4)              | 0.39     | 22 (25.9)            | 67 (29.9)             | 0.75                                          | 62 (32.98)                | 32 (34.78)           | 134 (37.85)         | <0.01                | 30 (31.25) | 110 (34.48) | <0.01 |
| 24-59m                                | 46 (24.2)                       | 26 (24.8)             | 6 (23.6)              | 0.80     | 20 (23.5)            | 47 (20.9)             | 0.92                                          | 29 (15.43)                | 11 (11.96)           | 98 (27.68)          | <0.01                | 18 (18.75) | 93 (29.15)  | <0.01 |
| <b>Gender (female)</b>                | 77 (40.5)                       | 45 (42.7)             | 118 (49.8)            | 0.20     | 88 (39.3)            | 32 (37.7)             | 0.46                                          | 75 (39.89)                | 39 (40.39)           | 142 (40.11)         | 0.35                 | 36 (37.50) | 149 (46.71) | 0.01  |
| <b>Breastfeed</b>                     | 130 (68.4)                      | 69 (65.7)             | 163 (68.8)            | 0.52     | 61 (71.8)            | 172 (76.8)            | 0.37                                          | 40 (74.47)                | 75 (81.52)           | 227 (64.12)         | <0.01                | 65 (67.71) | 223 (69.91) | 0.68  |
| <b>Anthropometry</b>                  |                                 |                       |                       |          |                      |                       |                                               |                           |                      |                     |                      |            |             |       |
| Wasted                                | 41 (21.7)                       | 18 (17.1)             | 34 (14.4)             | 0.54     | 23 (27.4)            | 62 (27.8)             | 0.67                                          | 24 (12.83)                | 11 (11.96)           | 22 (6.21)           | <0.01                | 13 (13.68) | 32 (10.06)  | 0.36  |
| Stunted                               | 72 (38.1)                       | 35 (33.3)             | 62 (26.2)             | <0.01    | 37 (44.1)            | 83 (37.1)             | 0.61                                          | 56 (29.95)                | 27 (29.35)           | 97 (27.40)          | 0.19                 | 29 (30.53) | 115 (36.16) | <0.01 |
| Underweight                           | 76 (40.0)                       | 39 (37.1)             | 60 (25.3)             | 0.01     | 37 (43.5)            | 96 (42.9)             | 0.94                                          | 50 (26.60)                | 18 (19.57)           | 49 (13.84)          | 0.22                 | 32 (33.33) | 98 (30.72)  | 0.17  |
| MUAC <sup>†</sup>                     | 13.6±1.6                        | 13.9±1.5              | 14.0±1.6              | 0.51     | 13.2±1.5             | 13.8±1.6              | 0.39                                          | 13.89±1.39                | 14.05±1.54           | 14.48±1.31          | 0.13                 | 13.75±1.22 | 13.87±1.39  | 0.48  |
| <b>Clinical features</b>              |                                 |                       |                       |          |                      |                       |                                               |                           |                      |                     |                      |            |             |       |
| H/o duration of diarrhea <sup>†</sup> | 2.9±1.29                        | 3.1 ±1.38             | 2.7±1.21              | <0.01    | 2.7 ±1.14            | 2.9±1.38              | 0.09                                          | -                         | -                    | -                   | -                    | -          | -           | -     |
| Visible blood in stool                | 52 (27.4)                       | 11 (10.5)             | 33 (13.9)             | 0.07     | 41 (48.2)            | 98 (43.8)             | 0.36                                          | 3 (1.60)                  | 0 (0.0)              | 1 (0.28)            | ND                   | 3 (3.13)   | 2 (0.63)    | ND    |
| Vomiting ≥3 times/ day                | 81(42.6)                        | 57 (54.3)             | 116 (48.9)            | 0.30     | 24 (28.2)            | 64 (28.6)             | 0.94                                          | 3 (1.60)                  | 6 (1.69)             | 1 (1.09)            | ND                   | 2 (2.08)   | 8 (2.51)    | ND    |
| Fever on admission                    | 140 (73.7)                      | 82 (78.1)             | 178 (75.1)            | 0.35     | 58 (68.2)            | 132 (58.9)            | 0.20                                          | 50 (26.60)                | 34 (36.96)           | 102 (28.81)         | 0.31                 | 16 (16.67) | 37 (11.60)  | 0.07  |
| <b>Indicators of MSD</b>              |                                 |                       |                       |          |                      |                       |                                               |                           |                      |                     |                      |            |             |       |
| Sunken eyes                           | 146 (76.8)                      | 102(97.1)             | 226 (95.4)            | 0.08     | 44 (51.8)            | 135 (60.3)            | 0.04                                          | 0                         | -                    | -                   | -                    | -          | -           | -     |
| Loss of skin turgor                   | 52 (27.4)                       | 42 (40.0)             | 53 (22.4)             | <0.01    | 10 (11.8)            | 32 (14.3)             | 0.21                                          | 0                         | -                    | -                   | -                    | -          | -           | -     |
| IV rehydration needed                 | 36 (18.9)                       | 25 (23.8)             | 48 (20.3)             | <0.01    | 11 (12.9)            | 28 (12.5)             | 0.79                                          | 0                         | -                    | -                   | -                    | -          | -           | -     |
| Dysentery                             | 48 (25.3)                       | 9 (8.6)               | 26 (10.9)             | 0.14     | 39 (45.9)            | 97 (43.3)             | 0.72                                          | 0                         | -                    | -                   | -                    | -          | -           | -     |
| Required hospital admission           | 32 (16.8)                       | 23 (21.9)             | 47 (19.8)             | 0.19     | 9 (10.6)             | 25 (11.2)             | 0.90                                          | 0                         | -                    | -                   | -                    | -          | -           | -     |
| <b>Socio-demographic features</b>     |                                 |                       |                       |          |                      |                       |                                               |                           |                      |                     |                      |            |             |       |
| Primary caretaker (mother)            | 183 (96.3)                      | 98 (93.3)             | 231 (97.5)            | 0.15     | 85 (100)             | 220 (98.2)            | ND                                            | 184 (97.87)               | 92 (100)             | 340 (96.05)         | ND                   | 92 (95.83) | 316 (99.06) | ND    |
| Mothers' education (Illiterate)       | 51 (26.84)                      | 20 (19.1)             | 45 (19.2)             | 0.97     | 31 (36.5)            | 94 (41.9)             | 0.44                                          | 61 (32.45)                | 21 (22.83)           | 82 (23.23)          | 0.75                 | 40 (41.67) | 138 (43.26) | 0.68  |



|                                      |            |           |            |       |           |            |      |            |            |            |       |            |            |       |
|--------------------------------------|------------|-----------|------------|-------|-----------|------------|------|------------|------------|------------|-------|------------|------------|-------|
| Loose watery stool                   | 89 (46.8)  | 61 (58.1) | 129 (54.4) | <0.01 | 28 (32.9) | 87 (38.8)  | 0.21 | 0          | 0          | 12 (3.39)  | ND    | 0          | 0          | ND    |
| RBC present in stool                 | 28 (14.7)  | 5 (4.8)   | 8 (3.4)    | ND    | 23 (27.1) | 58 (25.9)  | 0.75 | 1          | 1          | 0          | ND    | 0          | 1          | ND    |
| Pus present in stool                 | 13 (6.8)   | 6 (5.7)   | 15 (6.4)   | 0.81  | 7 (8.2)   | 22 (9.8)   | 0.61 | 3 (1.60)   | 1 (1.09)   | 3 (0.85)   | ND    | 2 (2.08)   | 7 (2.19)   | ND    |
| Mucus present in stool               | 125 (66.1) | 78 (75.0) | 151 (63.9) | 0.01  | 47 (55.3) | 112 (50.0) | 0.10 | 22 (11.76) | 6 (6.59)   | 36 (10.17) | <0.01 | 16 (16.67) | 51 (15.99) | 0.83  |
| <b>Co pathogen isolated in stool</b> |            |           |            |       |           |            |      |            |            |            |       |            |            |       |
| <i>Campylobacter</i> spp.            | 24 (12.6)  | 6 (5.7)   | 24 (10.1)  | <0.01 | 18 (21.2) | 48 (21.4)  | 0.97 | 41 (21.81) | 10 (10.87) | 51 (14.41) | <0.01 | 31 (32.29) | 52 (16.30) | <0.01 |
| <i>Giardia</i>                       | 17 (8.9)   | 11 (10.5) | 37 (15.6)  | 00.01 | 6 (7.1)   | 30 (13.4)  | 0.13 | 34 (18.09) | 13 (14.13) | 98 (27.68) | <0.01 | 21 (21.88) | 66 (20.69) | 00.67 |

\*Variable will be added in multiple models if  $p < 0.25$  in bi-variate model

\*All variables are adjusted for country

<sup>¶</sup> Mean  $\pm$  standard deviation; Stunting: HAZ  $< -2$ , (%; for  $< 5$  years of age), Underweight: WAZ  $< -2$ , (%; for  $< 5$  years of age), Wasted: WHZ  $< -2$ , (%; for  $< 5$  years of age), MUAC (mid upper arm circumference), median (mean; for  $< 5$  years of age) Mid upper arm circumference, RBC = Red blood cell; Diarrhea: 3 or more stool/day, Fever: measured at least 38-degree c or parental perception; WASH; water, sanitation, and hygiene; OR, odds ratio; CI, confidence interval; SD., standard deviation; ND, not done; NTS, non-typhoidal *Salmonella*; MSD, Moderate to severe diarrhea

**S2 Table. Overall demographics, housing, animal exposures, clinical presentation, stool examination, and co-pathogens of the NTS-positive under 5 children**

| Characteristics                                   | NTS-positive<br>n (%) | NTS- negative<br>n (%) | p-value* |
|---------------------------------------------------|-----------------------|------------------------|----------|
| <b>Age group</b>                                  |                       |                        |          |
| 0-11m                                             | 184 (48.6)            | 445 (39.2)             | -        |
| 12-23m                                            | 119 (31.4)            | 395 (34.8)             | 0.02     |
| 24-59m                                            | 75 (19.8)             | 294 (25.9)             | <0.001   |
| <b>Gender (female)</b>                            | 152 (40.2)            | 497 (43.8)             | 0.22     |
| <b>Breastfed</b>                                  | 270 (71.4)            | 785 (69.2)             | 0.41     |
| <b>Baseline Anthropometry</b>                     |                       |                        |          |
| Wasted                                            | 65 (17.2)             | 150 (13.2)             | 0.05     |
| Stunted                                           | 128 (34.0)            | 357 (31.5)             | 0.36     |
| Underweight                                       | 126 (33.3)            | 303 (26.7)             | 0.01     |
| MUAC (mean ± SD)                                  | 13.7 ± 1.5            | 14.0 ± 1.5             | <0.001   |
| <b>Clinical features</b>                          |                       |                        |          |
| Visible blood in stool                            | 55 (14.5)             | 134 (11.8)             | 0.16     |
| Vomiting ≥3 times/ day                            | 84 (22.2)             | 194 (17.1)             | 0.02     |
| Fever                                             | 190 (50.2)            | 449 (39.6)             | <0.001   |
| Moderate to severe diarrhea                       | 461 (40.6)            | 190 (50.2)             | <0.001   |
| <b>Socio-demographic characteristics</b>          |                       |                        |          |
| Primary caretaker (mother)                        | 367 (97.0)            | 1107 (97.6)            | 0.57     |
| Mother's education                                |                       |                        |          |
| Illiterate                                        | 112 (29.6)            | 359 (31.7)             | 0.44     |
| Household characteristics                         |                       |                        |          |
| People regularly live in house (mean ± SD)        | 11.4 ± 9.0            | 9.4 ± 8.2              | 0.07     |
| People regularly sleep in house (mean ± SD)       | 8.1 ± 9.1             | 9.2 ± 11.4             | 0.09     |
| Presence of under 5 children at house (mean ± SD) | 1.0 ± 1.4             | 0.9 ± 1.5              | 0.30     |
| Natural floor (made of earth, sand, dung)         | 206 (54.5)            | 644 (56.7)             | 0.43     |
| Wealth index                                      |                       |                        |          |
| Poorest                                           | 62 (16.4)             | 211 (18.6)             | -        |
| Lower middle                                      | 84 (22.2)             | 242 (21.3)             | 0.38     |
| Middle                                            | 89 (23.5)             | 278 (24.5)             | 0.65     |
| Upper middle                                      | 63 (16.6)             | 185 (16.3)             | 0.47     |
| Richest                                           | 80 (21.1)             | 218 (19.2)             | 0.25     |
| Animal at house                                   |                       |                        |          |
| Cow                                               | 167 (44.1)            | 443 (39.0)             | 0.07     |
| Dog                                               | 197 (52.1)            | 557 (49.1)             | 0.31     |
| Cat                                               | 196 (51.8)            | 554 (48.8)             | 0.31     |
| Rodent/ Fowl                                      | 246 (65.0)            | 719 (63.4)             | 0.55     |
| Goat                                              | 145 (38.3)            | 389 (34.3)             | 0.15     |
| Sheep                                             | 80 (21.1)             | 232 (20.4)             | 0.76     |
| <b>WASH</b>                                       |                       |                        |          |
| The main source of drinking water                 |                       |                        |          |
| Use tube well water                               | 81 (21.4)             | 263 (23.1)             | 0.47     |

|                                        |            |             |        |
|----------------------------------------|------------|-------------|--------|
| Treat drinking water                   | 151 (39.9) | 426 (37.5)  | 0.40   |
| Fecal disposal                         |            |             |        |
| Toilet facility available              | 330 (87.3) | 996 (87.83) | 0.78   |
| Hand washing practice                  |            |             |        |
| Before eating                          | 301 (79.6) | 918 (80.9)  | 0.57   |
| Before cooking                         | 220 (58.2) | 655 (57.7)  | 0.88   |
| Before nurse/prepare baby food         | 128 (33.8) | 378 (33.3)  | 0.85   |
| After defecation                       | 267 (70.6) | 778 (68.6)  | 0.46   |
| After handling animals                 | 49 (12.9)  | 120 (10.5)  | 0.20   |
| After cleaning a child                 | 166 (43.9) | 465 (41.0)  | 0.32   |
| Hand wash material                     |            |             |        |
| Routinely uses water and soap          | 298 (78.8) | 933 (82.2)  | 0.13   |
| <b>Stool examination</b>               |            |             |        |
| Loose watery stool                     | 89 (23.5)  | 228 (20.1)  | 0.15   |
| RBC present in stool                   | 29 (7.6)   | 67 (5.91)   | 0.22   |
| Pus present in stool                   | 16 (4.2)   | 47 (4.1)    | 0.94   |
| Mucus present in stool                 | 147 (39.1) | 350 (30.8)  | <0.001 |
| <b>Co pathogen isolated from stool</b> |            |             |        |
| <i>Campylobacter</i>                   | 65 (17.2)  | 175 (15.4)  | 0.41   |
| <i>Giardia</i>                         | 51 (13.4)  | 231 (20.3)  | <0.001 |
| <i>Cryptosporidium</i>                 | 26 (6.8)   | 78 (6.8)    | 1.00   |
| EAEC                                   | 78 (20.6)  | 227 (20.0)  | 0.79   |
| ETEC                                   | 30 (7.9)   | 101 (8.9)   | 0.56   |

**\*All variables are adjusted for country**

Stunting: HAZ < -2, (%; for < 5 years of age), Underweight: WAZ < -2, (%; for < 5 years of age), Wasted: WHZ < -2, (%; for < 5 years of age), MUAC, median (mean; for < 5 years of age) Mid upper arm circumference, RBC = Red blood cell

Fever: measured at least 38-degree c or parental perception; WASH; water, sanitation, and hygiene

OR, odds ratio; CI, confidence interval; SD., standard deviation; NTS, non-typhoidal *Salmonella*; EAEC: Enteraggregative *E. coli*, ETEC: Enterotoxigenic *E. coli*.
